# Supplementary material for: Analysis of worldwide sequence mutations in Zika virus proteins E, NS1, NS3 and NS5 from a structural point of view
Source: Royal Society of Chemistry journal article supplement (doi:10.1039/c6mb00645k), 2016-10-19

## Analysis of worldwide sequence mutations in Zika virus proteins E, NS1, NS3 and NS5 from a structural point of view

### SUPPLEMENTARY INFORMATION

#### Supplementary Results

##### Validation test of the ZIKV structural models

Structural models for ZIKV proteins NS1, NS3 and NS5 were created and refined as explained on the methods section. After refinement, the quality of the models was assessed by means of the Ramachandran Plot, were 96.3% 96.6% and 97.7% of the residues were found in favored regions for the NS1, NS3 and NS5 proteins, respectively. The few outlier residues are located on flexible loops in the protein structures. The quality of the models was also validated with the Verify-3D server, finding 81.25%, 83,68% and 87.98% of the residues with an averaged 3D-1D score higher than 0.2, for the NS1, NS3 and NS5 proteins, respectively.

#### Supplementary Tables

**Table S1:** Mutations in protein C of ZIKV, according to protein structural regions, geographical origin, sequence accession number in Genbank and clinical data, when available.

**Table S2:** Mutations in protein prM of ZIKV, according to protein structural regions, geographical origin, sequence accession number in Genbank and clinical data, when available.

**Table S3:** Mutations in E protein of ZIKV, according to protein structural regions, geographical origin, sequence accession number in Genbank and clinical data, when available.

**Table S4:** Mutations in NS1 protein of ZIKV, according to protein structural regions, geographical origin, sequence accession number in Genbank and clinical data, when available.

**Table S5:** Mutations in NS2A protein of ZIKV, according to protein structural regions, geographical origin, sequence accession number in Genbank and clinical data, when available.

**Table S6:** Mutations in NS2B protein of ZIKV, according to protein structural regions, geographical origin, sequence accession number in Genbank and clinical data, when available.

**Table S7:** Mutations in NS3 protein of ZIKV, according to protein structural regions, geographical origin, sequence accession number in Genbank and clinical data, when available.

**Table S8:** Mutations in NS4A protein of ZIKV, according to protein structural regions, geographical origin, sequence accession number in Genbank and clinical data, when available.

**Table S9:** Mutations in NS4B protein of ZIKV, according to protein structural regions, geographical origin, sequence accession number in Genbank and clinical data, when available.

**Table S10:** Mutations in NS5 protein of ZIKV, according to protein structural regions, geographical origin, sequence accession number in Genbank and clinical data, when available.

#### Supplementary Figures

**Figure S1.** Molecular Phylogenetic analysis by the Maximum Likelihood method. The evolutionary history of 41 non-recombinant Zikavirus sequences available in GenBank database up to April,2016 was inferred by using the Maximum Likelihood method based on the Tamura-Nei model. Two major lineages, namely African and Asian, can be observed. Within the Asian lineage a new clade can be found, named American lineage.

**Figure S2.** ZIKV E protein (PDB 5IRE), showing the mutations found in zika patients. Mutations corresponding to substitutions between very similar aminoacids, namely V-L, S-T, R-K, D-E, are shown in blue. The other substitutions are shown in red. The different regions of the protein structure are highlighted. The figure has been created with The PyMOL Molecular Graphics System, Version 1.8 Schrödinger, LLC.

**Figure S3.** ZIKV NS1 model, showing the mutations found in zika patients. Same coloring scheme as Figure S1. One monomer is shown in white and the other in black. The different regions of the protein structure are highlighted. The figure has been created with The PyMOL Molecular Graphics System, Version 1.8 Schrödinger, LLC.

**Figure S4.** ZIKV NS3 model, showing the mutations found in zika patients. Same coloring scheme as Figure S1. The different regions of the protein structure are highlighted. The figure has been created with The PyMOL Molecular Graphics System, Version 1.8 Schrödinger, LLC.

**Figure S5.** ZIKV NS5 model. In a) mutations found in zika patients are shown, with the same coloring scheme as Figure S1. The different regions of the protein structure are highlighted. In b) the main protein domains are colored as follows: MTase (black), linker (white), Fingers (magenta),  $\alpha$ -NLS (green),  $\alpha$ ,  $\beta$ -NLS (cyan), Palm (yellow), Thumb (pale pink), priming loop (blue). The figure has been created with The PyMOL Molecular Graphics System, Version 1.8 Schrödinger, LLC.

**Figure S6.** Mutations found on Microcephaly samples: a) NS1 protein of the Microcephaly sample KU527068, b) From left to right, E and NS5 proteins of the Microcephaly sample KU497555, c) From left to right, E, NS1 and NS5 proteins of the Microcephaly sample KU729217. Mutated residues are shown as red spheres. The structures have the same orientation of figures S1-4. The figure has been created with The PyMOL Molecular Graphics System, Version 1.8 Schrödinger, LLC.

**Table S1:** Mutations in protein C of ZIKV, according to protein structural regions, geographical origin, sequence accession number in Genbank and clinical data, when available.

| Aminoacid location on the protein structure | Mutations                 | Geographical origin (Country) | Sequence accession number in Genbank                                 | Host                                      |
|---------------------------------------------|---------------------------|-------------------------------|----------------------------------------------------------------------|-------------------------------------------|
|                                             | <b>K6R</b>                | Africa                        | HQ234501; KF383117                                                   | Mosquitoes, cell culture                  |
|                                             | <b>K7R</b>                | Africa                        | KF383116                                                             | Mosquitoes                                |
|                                             | <b>G10R</b>               | Africa                        | KF383118                                                             | Mosquitoes                                |
|                                             | <b>S25N</b>               | Africa                        | DQ859059; AY632535; HQ234500; KF268948; LC002520; KU720415           | Mosquitoes, cell culture, sentinel monkey |
|                                             | <b>F27L</b>               | Africa                        | DQ859059; AY632535; HQ234500; KF268948; LC002520; KU720415           | Mosquitoes, cell culture, sentinel monkey |
|                                             | <b>S71T</b>               | Africa                        | DQ859059                                                             | Mosquitoes, cell culture                  |
|                                             | <b>E76D</b>               | Americas (Chi/Ven)            | KU744693                                                             | ZIKV infection                            |
|                                             | <b>I80T</b>               | America (Puerto Rico)         | KU501215                                                             | ZIKV infection                            |
|                                             | <b>K101R</b>              | Africa                        | DQ859059; AY632535; HQ234500; KF268948; KF383115; LC002520; KU720415 | Mosquitoes/cell culture/ sentinel monkey  |
|                                             | <b>G105S</b>              | America (Brazil)              | KU729218                                                             | ZIKV infection                            |
|                                             | <b>A106T</b> <sup>1</sup> | Asia (Thailand)               | KU681081                                                             | Mosquitoes/cell culture                   |
|                                             |                           | Asia (Micronesia)             | EU545988                                                             | ZIKV infection                            |
|                                             |                           | Asia (Cambodia)               | JN860885                                                             |                                           |
|                                             |                           |                               | KF993678                                                             |                                           |
|                                             | <b>D107E</b> <sup>1</sup> | America (Mexico)              | KU922923; KU922960                                                   | ZIKV infection                            |
|                                             |                           | America (Martinique)          | KU647676                                                             | ZIKV infection                            |
|                                             | <b>T108A</b> <sup>1</sup> | Africa                        | HQ234500                                                             | Cell culture                              |
|                                             | <b>S109N</b> <sup>1</sup> | Asia (Chi/Samoa)              | KU866423; KU820899                                                   | ZIKV infection                            |
|                                             | <b>V110I</b> <sup>1</sup> | Africa                        | DQ859059; AY632535; HQ234500; KF268948; KF383115; LC002520; KU720415 | Mosquitoes, cell culture, sentinel monkey |
|                                             | <b>V113I</b> <sup>1</sup> | Africa                        | AY632535; KF268948; KF383115; KF383117; LC002520; KU720415           | Mosquitoes, cell culture, sentinel monkey |
|                                             | <b>G114S</b> <sup>1</sup> | Africa                        | HQ234500                                                             | Cell culture                              |
|                                             | <b>A120V</b> <sup>1</sup> | Africa                        | HQ234500                                                             | Cell culture                              |

<sup>1</sup>Mutations belonging to the propeptide.

**Table S2:** Mutations in protein prM of ZIKV, according to protein structural regions, geographical origin, sequence accession number in Genbank and clinical data, when available.

| Aminoacid location on the protein structure | Mutations | Geographical origin (Country) | Sequence accession number in Genbank                                 | Host                                      |
|---------------------------------------------|-----------|-------------------------------|----------------------------------------------------------------------|-------------------------------------------|
| <b>A123V</b>                                |           | Asia (Philippines)            | KU681082                                                             | ZIKV infection                            |
|                                             |           | Asia (Micronesia)             | EU545988                                                             | ZIKV infection                            |
|                                             |           | Asia (Malaysia)               | HQ234499                                                             | Cell culture                              |
|                                             |           | Asia (Cambodia)               | JN860885                                                             | ZIKV infection                            |
| <b>V125I</b>                                |           | Africa                        | DQ859059; AY632535; HQ234500; KF268948; KF383115; LC002520; KU720415 | Mosquitoes, cell culture, sentinel monkey |
| <b>S130N</b>                                |           | Asia (Cambodia)               | JN860885                                                             | ZIKV infection                            |
| <b>N139S</b>                                |           | Asia (Thailand)               | KU681081                                                             | ZIKV infection                            |
|                                             |           | Asia (Philippines)            | KU681082                                                             | ZIKV infection                            |
|                                             |           | Asia (Micronesia)             | EU545988                                                             | ZIKV infection                            |
|                                             |           | Asia (Malaysia)               | HQ234499                                                             | Cell culture                              |
|                                             |           | Asia (Cambodia)               | JN860885                                                             | ZIKV infection                            |
|                                             |           | Africa                        | DQ859059; LC002520; KU720415                                         | Mosquitoes, cell culture, sentinel monkey |
| <b>E143K</b>                                |           | Africa                        | DQ859059; AY632535; HQ234500; KF268948; KF383115; LC002520; KU720415 | Mosquitoes, cell culture, sentinel monkey |
| <b>P148A</b>                                |           | Africa                        | DQ859059; AY632535; HQ234501; KF268948; KF383115; LC002520; KU720415 | Mosquitoes, cell culture, sentinel monkey |
| <b>P148V</b>                                |           | Africa                        | HQ234500                                                             | Cell culture                              |
| <b>T150N</b>                                |           | Africa                        | KF268948; KF268949; KF268950                                         | Mosquitoes                                |
| <b>L151M</b>                                |           | Asia (Cambodia)               | JN860885                                                             | ZIKV infection                            |
| <b>M153V</b>                                |           | Asia (Malaysia)               | HQ234499                                                             | Cell culture                              |
|                                             |           | Africa                        | DQ859059; AY632535; KF268948; KF383115; LC002520; KU720415           | Mosquitoes, cell culture, sentinel monkey |

|              |                    |                                                                                         |                                                 |
|--------------|--------------------|-----------------------------------------------------------------------------------------|-------------------------------------------------|
| <b>Y157H</b> | Africa             | HQ234500; DQ859059;<br>AY632535; KF268948;<br>KF383115; LC002520;<br>KU720415           | Mosquitoes, cell<br>culture, sentinel<br>monkey |
| <b>I158V</b> | Africa             | HQ234500; DQ859059;<br>AY632535; KF268948;<br>KF383115; LC002520;<br>KU720415           | Mosquitoes, cell<br>culture, sentinel<br>monkey |
| <b>M166T</b> | America (Suriname) | KU312312                                                                                | ZIKV infection                                  |
| <b>H204Q</b> | Africa             | KF383116                                                                                | Mosquitoes                                      |
| <b>A210T</b> | Africa             | KF383118                                                                                | Mosquitoes                                      |
| <b>T218S</b> | Africa             | KF383118                                                                                | Mosquitoes                                      |
| <b>P220R</b> | Africa             | KF383118                                                                                | Mosquitoes                                      |
| <b>S221Y</b> | Africa             | KF383118                                                                                | Mosquitoes                                      |
| <b>S223Y</b> | Africa             | KF383118                                                                                | Mosquitoes                                      |
| <b>T241K</b> | Africa             | KF383118                                                                                | Mosquitoes                                      |
| <b>R246M</b> | Africa             | KF383118                                                                                | Mosquitoes                                      |
| <b>R246K</b> | Africa             | DQ859059; AY632535;<br>HQ234500; KF268948;<br>KF383115; KF383119;<br>LC002520; KU720415 | Mosquitoes, cell<br>culture, sentinel<br>monkey |
| <b>A258T</b> | Africa             | DQ859059                                                                                | Mosquitoes, cell<br>culture                     |
| <b>L259I</b> | Africa             | KF383118                                                                                | Mosquitoes                                      |
| <b>A260V</b> | Africa             | DQ859059; AY632535;<br>HQ234500; KF383116;<br>KF383118; LC002520;<br>KU720415           | Mosquitoes, cell<br>culture, sentinel<br>monkey |
| <b>A261S</b> | Africa             | KF383118                                                                                | Mosquitoes                                      |
| <b>A262V</b> | Africa             | DQ859059; AY632535;<br>HQ234500; KF268948;<br>KF383115; LC002520;<br>KU720415           | Mosquitoes, cell<br>culture, sentinel<br>monkey |
| <b>A263V</b> | Asia (Philipines)  | KU681082                                                                                | ZIKV infection                                  |
| <b>A265T</b> | Africa             | KF383118                                                                                | Mosquitoes                                      |
| <b>L268M</b> | Africa             | KF383118                                                                                | Mosquitoes                                      |
| <b>S271L</b> | Africa             | KF383118                                                                                | Mosquitoes                                      |
| <b>V280I</b> | Africa             | KF383115                                                                                | Mosquitoes, cell<br>culture, sentinel<br>monkey |
| <b>L283V</b> | Africa             | KF383118                                                                                | Mosquitoes                                      |
| <b>A286V</b> | Africa             | KF383118                                                                                | Mosquitoes                                      |
| <b>P287L</b> | America (Mexico)   | KU922923                                                                                | ZIKV infection                                  |

**Table S3:** Mutations in E protein of ZIKV, according to protein structural regions, geographical origin, sequence accession number in Genbank and clinical data, when available.

| Aminoacid location on the protein structure | Mutations <sup>1</sup> | Geographical origin (Country) | Sequence accession number in Genbank                       | Host                                      |
|---------------------------------------------|------------------------|-------------------------------|------------------------------------------------------------|-------------------------------------------|
| Domain 1 (DI)                               | <b>F11(301)L</b>       | Africa                        | KF383118                                                   | Mosquitoes                                |
|                                             | <b>V23(413)L</b>       | America (Brazil)              | KU321639                                                   | ZIKV infection                            |
|                                             | <b>V33(323)A</b>       | America (Chi/Ven)             | KU744693                                                   | ZIKV infection                            |
|                                             | <b>V33(323)E</b>       | Africa                        | KF383118                                                   | Mosquitoes                                |
|                                             | <b>T40(330)A</b>       | Asia (Micronesia)             | EU545988                                                   | ZIKV infection                            |
|                                             | <b>T47(337)S</b>       | America (Brazil)              | KU729217                                                   | Microcephaly                              |
|                                             | <b>T48(338)M</b>       | Africa                        | KF383118                                                   | Mosquitoes                                |
|                                             | <b>S142(432)P</b>      | Africa                        | KF383118                                                   | Mosquitoes                                |
|                                             | <b>I152(442)L</b>      | America (Chi/Ven)             | KU744693                                                   | ZIKV infection                            |
|                                             | <b>I152(442)T</b>      | Africa                        | LC002520                                                   | Sentinel monkey                           |
|                                             | <b>T156(-)I</b>        | Africa                        | LC002520; KF383119; KF383118; KF383116; HQ234500; HQ234498 | Sentinel monkey, Mosquitoes, cell culture |
|                                             | <b>H158(444)Y</b>      | Africa                        | HQ234498; KU720415; LC002520; NC012532; AY632535           | Sentinel monkey, Mosquitoes, cell culture |
|                                             | <b>N163(449)D</b>      | Africa                        | NC012532; AY632535;                                        | Sentinel monkey                           |
|                                             | <b>K166(452)E</b>      | Africa                        | KF383115                                                   | Mosquitoes                                |
|                                             | <b>I169(455)V</b>      | Africa                        | All African sequences                                      | Sentinel monkey, mosquitoes, cell culture |
| Domain 2 (DII)                              | <b>V56(346)I</b>       | America (Guatemala)           | KU501217; KU501216                                         | ZIKV infection                            |
|                                             | <b>S64(354)T</b>       | America (Brazil)              | KU729217                                                   | Microcephaly                              |
|                                             | <b>I65(355)L</b>       | Africa                        | KF383118                                                   | Mosquitoes                                |
|                                             | <b>M68(358)T</b>       | America (Brazil)              | KU940227                                                   | Unknown                                   |
|                                             | <b>M68(358)I</b>       | America (Brazil)              | KU729217                                                   | Microcephaly                              |
|                                             | <b>D71(361)A</b>       | Africa                        | KF383118                                                   | Mosquitoes                                |
|                                             | <b>A80(370)P</b>       | Africa                        | KF383118                                                   | Mosquitoes                                |
|                                             | <b>Y81(371)S</b>       | Africa                        | KF383118                                                   | Mosquitoes                                |
|                                             | <b>Y90(380)S</b>       | Africa                        | KF383118                                                   | Mosquitoes                                |
|                                             | <b>V97(387)G</b>       | Africa                        | KF383118                                                   | Mosquitoes                                |
|                                             | <b>L107(397)I</b>      | Africa                        | KF383118                                                   | Mosquitoes                                |
|                                             | <b>A117(407)S</b>      | Africa                        | KF383118                                                   | Mosquitoes                                |
|                                             | <b>A120(410)T</b>      | Africa                        | All African sequences                                      | Mosquitoes, sentinel monkey, cell culture |

|                 |                   |                   |                                        |                                           |
|-----------------|-------------------|-------------------|----------------------------------------|-------------------------------------------|
|                 | <b>S122(412)C</b> | Africa            | KF383118                               | Mosquitoes                                |
|                 | <b>T126(416)P</b> | Africa            | KF383118                               | Mosquitoes                                |
|                 | <b>W211(497)R</b> | Africa            | KF383117                               | Mosquitoes                                |
|                 | <b>V213(499)A</b> | America (Chi/Ven) | KU744693                               | ZIKV infection                            |
|                 | <b>H214(500)R</b> | Africa            | KF383117                               | Mosquitoes                                |
|                 | <b>A227(513)S</b> | Africa            | HQ234501                               | Mosquitoes                                |
|                 | <b>A227(513)T</b> | Asia (Thailand)   | KU681081                               | ZIKV infection& cell culture              |
|                 | <b>D230(516)A</b> | America (Chi/Ven) | KU744693                               | ZIKV infection                            |
|                 | <b>G232(518)E</b> | Africa            | HQ234500                               | Cell culture                              |
|                 | <b>V255(541)A</b> | America (Brazil)  | KU729217                               | Microcephaly                              |
|                 | <b>S260(546)T</b> | America (Brazil)  | KU497555                               | Microcephaly                              |
|                 | <b>R283(569)K</b> | Africa            | LC002520; HQ234498; KU720415           | Cell culture, sentinel monkey             |
|                 | <b>S285(571)E</b> | Africa            | All African sequences                  | Mosquitoes, cell culture, sentinel monkey |
| Domain 3 (DIII) | <b>T309(595)N</b> | America (Brazil)  | KU940227                               | Unknown                                   |
|                 | <b>A311(597)V</b> | Africa            | KF383116                               | Mosquitoes                                |
|                 | <b>F312(598)C</b> | Africa            | KF383116                               | Mosquitoes                                |
|                 | <b>F314(560)A</b> | Africa            | KF383116                               | Mosquitoes                                |
|                 | <b>T315(601)A</b> | Africa            | KF383116                               | Mosquitoes                                |
|                 | <b>I317(603)V</b> | Africa            | All African sequences                  | Mosquitoes, cell culture, sentinel monkey |
|                 | <b>L322(608)V</b> | America (Chi/Ven) | KU744693                               | ZIKV infection                            |
|                 | <b>H323(609)D</b> | America (Chi/Ven) | KU744693                               | ZIKV infection                            |
|                 | <b>V330(616)G</b> | America (Chi/Ven) | KU744693                               | ZIKV infection                            |
|                 | <b>Y332(618)S</b> | Africa            | KF383118                               | Mosquitoes                                |
|                 | <b>A333(619)G</b> | America (Chi/Ven) | KU744693                               | ZIKV infection                            |
|                 | <b>T335(621)R</b> | America (Brazil)  | KU926310                               | ZIKV infection                            |
|                 | <b>T335(621)A</b> | Africa            | HQ234500                               | Mosquitoes                                |
|                 | <b>V341(627)F</b> | Africa            | LC002520; HQ234498; NC012532; AY632535 | Cell culture, sentinel monkey             |
|                 | <b>A343(629)V</b> | Africa            | LC002520; HQ234498; NC012532; AY632535 | Cell culture, sentinel monkey             |
|                 | <b>M349(635)T</b> | America (Brazil)  | KU729217                               | Microcephaly                              |
|                 | <b>S368(654)G</b> | Asia (Thailand)   | KU681081                               | ZIKV infection& cell culture              |
|                 | <b>H401(687)L</b> | Africa            | KF383117                               | Mosquitoes                                |
|                 | <b>R402(688)K</b> | Africa            | KF383117                               | Mosquitoes                                |
|                 | <b>S403(689)K</b> | Africa            | KF383117                               | Mosquitoes                                |

|                      |                   |                    |                                        |                                           |
|----------------------|-------------------|--------------------|----------------------------------------|-------------------------------------------|
| Stem-anchor region   | <b>T406(692)S</b> | Africa             | KF383117                               | Mosquitoes                                |
|                      | <b>T406(692)I</b> | Africa             | HQ234500                               | Cell culture                              |
|                      | <b>K419(705)R</b> | Asia (Chi/ Sam)    | KU866423; KU820899                     | ZIKV infection                            |
|                      | <b>A437(723)V</b> | Asia (Thailand)    | KU681081                               | ZIKV infection & cell culture             |
|                      |                   | Africa             | All African sequences                  | Sentinel monkey, cell culture, mosquitoes |
|                      | <b>L438(724)F</b> | Africa             | All African sequences                  | Sentinel monkey, cell culture, mosquitoes |
|                      | <b>I445(731)V</b> | Africa             | KF383117; HQ234498; DQ859059; KF268950 | Cell culture, mosquitoes                  |
|                      | <b>F449(735)I</b> | America (Chi/Ven)  | KU744693                               | ZIKV infection                            |
|                      | <b>M473(759)V</b> | Africa             | All African sequences                  | Sentinel monkey, cell culture, mosquitoes |
|                      |                   | Asia (Malaysia)    | HQ234499                               | Cell culture                              |
|                      |                   | Asia (Philippines) | KU681082                               | ZIKV infection & cell culture             |
|                      |                   | Asia (Micronesia)  | EU545988                               | ZIKV infection                            |
|                      |                   | Asia (Cambodia)    | JN860885                               | ZIKV infection                            |
|                      |                   |                    |                                        |                                           |
| Transmembrane region | <b>T479(765)A</b> | America (Suriname) | KU312312                               | ZIKV infection                            |
|                      | <b>M487(773)T</b> | Africa             | All African sequences                  | Sentinel monkey, cell culture, mosquitoes |
|                      |                   | Asia (Malaysia)    | HQ234499                               | Cell culture                              |
|                      |                   | Asia (Philippines) | KU681082                               | ZIKV infection & cell culture             |
|                      |                   | Asia (Micronesia)  | EU545988                               | ZIKV infection                            |
|                      | <b>L495(781)M</b> | Africa             | All African sequences                  | Sentinel monkey, cell culture, mosquitoes |
|                      | <b>A504(790)G</b> | America (Chi/Ven)  | KU744693                               | ZIKV infection                            |
|                      | <b>D505(791)G</b> | America (Chi/Ven)  | KU744693                               | ZIKV infection                            |

<sup>1</sup>: Mutations according to the PBD numbering in bold letter, and polyprotein numbering in brackets (uniprot entry Q32ZE10).



**Table S4:** Mutations in NS1 protein of ZIKV, according to protein structural regions, geographical origin, sequence accession number in Genbank and clinical data, when available.

| Aminoacid location on the protein structure | Mutations <sup>1</sup>                           | Geographical origin (Country) | Sequence accession number in Genbank                                 | Host                                      |
|---------------------------------------------|--------------------------------------------------|-------------------------------|----------------------------------------------------------------------|-------------------------------------------|
| Membrane-binding region                     | <b>K11(801)R</b>                                 | Africa                        | KF383119; KF383115; KF268950; KF268949; KF268948                     | Mosquitoes, cell culture                  |
|                                             | <b>E26(816)D</b>                                 | Asia (Micronesia)             | EU545988                                                             | ZIKV infection                            |
|                                             | <b>K33(823)R</b>                                 | Africa                        | HQ234500                                                             | Cell culture                              |
| Dimerization region                         | <b>D1(791)G</b>                                  | America (Chi/Ven)             | KU744693                                                             | ZIKV infection                            |
|                                             | <b>V162(952)I</b>                                | Africa                        | HQ234501; KF383117; KF383116                                         | Mosquitoes, cell culture                  |
|                                             |                                                  | Asia (Malaysia)               | HQ234499                                                             | Cell culture                              |
|                                             | <b>V188(978)A</b>                                | Asia (Micronesia)             | EU545988                                                             | ZIKV infection                            |
|                                             |                                                  | Asia (Cambodia)               | JN860885                                                             | ZIKV infection                            |
|                                             |                                                  | Asia (Philippines)            | KU681082                                                             | ZIKV infection                            |
|                                             | <b>G190(980)E</b>                                | America (Brazil)              | KU729217                                                             | Microcephaly                              |
|                                             | <b>K191(981)R</b>                                | Africa                        | LC002520; KF383119; KF383118; HQ234500; HQ234498; AY632535; NC012532 | Mosquitoes, cell culture, sentinel monkey |
|                                             | <b>V194(984)A</b>                                | Africa                        | All African sequences                                                | Mosquitoes, cell culture, sentinel monkey |
|                                             | <b>T233(1023)A</b>                               | America (Brazil)              | KU527068                                                             | Microcephaly                              |
| Hexameration region                         | <b>R69(859)K</b>                                 | Africa                        | All African sequences                                                | Mosquitoes, cell culture, sentinel monkey |
|                                             | <b>R211(1001)W</b>                               | America (Chi/Ven)             | KU744693                                                             | ZIKV infection                            |
|                                             |                                                  | Asia (Thailand)               | KU681081                                                             | ZIKV infection& cell culture              |
|                                             | <b>K213(1003)R</b>                               | Africa                        | HQ234501; KF383117; KF383116                                         | Mosquitoes, cell culture                  |
|                                             |                                                  | Asia (Chi/Sam)                | KU866423; KU820899                                                   | ZIKV infection                            |
|                                             | <b>R324(1114)Q</b>                               | Asia (Chi/Ven)                | KU744693                                                             | ZIKV infection                            |
|                                             |                                                  | America (Mexico)              | KU922960; KU922923                                                   | ZIKV infection                            |
|                                             | <b>R324(1114)W</b>                               | America (Colombia)            | KU820897                                                             | ZIKV infection                            |
|                                             |                                                  | America (Martinique)          | KU647676                                                             | ZIKV infection                            |
|                                             | Loop region (not resolved in crystal structures) | <b>E110(900)G</b>             | Africa                                                               | KF383116                                  |
| <b>Y122(912)H</b>                           |                                                  | America (Brazil)              | KU321639                                                             | ZIKV infection                            |
|                                             | America (Haiti)                                  | KU509998                      | ZIKV infection                                                       |                                           |

|                                                            |                    |                     |                                                  |                                           |
|------------------------------------------------------------|--------------------|---------------------|--------------------------------------------------|-------------------------------------------|
| Solvent accessible surface both in dimer and hexamer forms | <b>V21(811)I</b>   | Africa              | LC002520; AY632535; NC012532; KU720415; HQ234498 | Cell culture, sentinel monkey             |
|                                                            | <b>A45(835)V</b>   | Asia (Thailand)     | KU681081                                         | ZIKV infection& cell culture              |
|                                                            | <b>D52(842)E</b>   | Africa              | All African sequences                            | Mosquitoes, cell culture, sentinel monkey |
|                                                            | <b>G100(890)A</b>  | America (Guatemala) | KU501216; KU501217                               | ZIKV infection                            |
|                                                            | <b>Q102(892)R</b>  | Africa              | HQ234500                                         | Cell culture                              |
|                                                            | <b>S132(922)R</b>  | Africa              | HQ234499                                         | Cell culture                              |
|                                                            | <b>K146(936)E</b>  | Africa              | LC002520; AY632535; NC012532; KU720415; HQ234498 | Mosquitoes, cell culture, sentinel monkey |
|                                                            |                    | America (Brazil)    | KU527068                                         | Microcephaly                              |
|                                                            | <b>S176(966)W</b>  | America (Chi/Ven)   | KU744693                                         | ZIKV infection                            |
|                                                            | <b>G199(989)C</b>  | Africa              | KF383117                                         | Mosquitoes                                |
|                                                            | <b>I236(1026)V</b> | Africa              | All African sequences                            | Mosquitoes, cell culture, sentinel monkey |
|                                                            |                    | Asia (Philippines)  | KU681082                                         | ZIKV infection& cell culture              |
|                                                            | <b>T256(1046)A</b> | America (Chi/Ven)   | KU744693                                         | ZIKV infection                            |
|                                                            | <b>M264(1054)V</b> | Asia (Malaysia)     | HQ234499                                         | Mosquitoes cell culture                   |
|                                                            |                    | Africa              | All African sequences                            | Mosquitoes, cell culture, sentinel monkey |
|                                                            | <b>M264(1054)A</b> | Africa              | KF383115; KF268950; KF268949; KF268948           | Mosquitoes                                |
|                                                            | <b>M264(1054)L</b> | Africa              | HQ234501                                         | Mosquitoes cell culture                   |
|                                                            | <b>H286(1076)Y</b> | Africa              | LC002520; KF383117; AY632535; NC012532; KU720415 | Mosquitoes, cell culture, sentinel monkey |
|                                                            | <b>C313(1103)S</b> | America (Chi/Ven)   | KU744693                                         | ZIKV infection                            |
|                                                            | <b>M349(1139)V</b> | America (Brazil)    | KU729217; KU527068                               | Microcephaly                              |
| KU926310                                                   |                    |                     | ZIKV infection                                   |                                           |
| America (Dom Rep)                                          |                    | KU853013; KU853012  | ZIKV infection                                   |                                           |

<sup>1</sup>: Mutations according to the PBD numbering in bold letter, and polyprotein numbering in brackets (uniprot entry Q32ZE10).

**Table S5:** Mutations in NS2A protein of ZIKV, according to protein structural regions, geographical origin, sequence accession number in Genbank and clinical data, when available.

| Aminoacid location on the protein structure | Mutations     | Geographical origin (Country) | Sequence accession number in Genbank                                                                                                                           | Host                                      |
|---------------------------------------------|---------------|-------------------------------|----------------------------------------------------------------------------------------------------------------------------------------------------------------|-------------------------------------------|
|                                             | <b>I1176M</b> | Africa                        | KU720415; LC002520; KF383119; KF383118; KF383117; KF383116; HQ234501; HQ234500; HQ234498; NC012532; KF268950; KF268949; KF268948; AY632535; DQ859059           | Mosquitoes, cell culture, sentinel monkey |
|                                             | <b>I1176V</b> | Africa                        | KF383115                                                                                                                                                       | Sentinel monkey, Mosquitoes, cell culture |
|                                             | <b>V1182M</b> | Africa                        | HQ234500                                                                                                                                                       | Cell culture                              |
|                                             | <b>A1185V</b> | Africa                        | KU720415; LC002520; KF383119; KF383118; HQ234498; NC012532; AY632535;                                                                                          | Mosquitoes, cell culture, sentinel monkey |
|                                             | <b>I1187V</b> | Africa                        | KF383117; KF383116; HQ234501; HQ234500                                                                                                                         | Mosquitoes, cell culture, sentinel monkey |
|                                             | <b>S1192L</b> | Africa                        | KF268950; KF268948                                                                                                                                             | Mosquitoes                                |
|                                             | <b>A1200V</b> | Africa                        | KU720415; LC002520; KF383119; KF383118; KF383117; KF383116; KF383115; HQ234501; HQ234500; HQ234498; NC012532; KF268950; KF268949; KF268948; AY632535; DQ859059 | Mosquitoes, cell culture, sentinel monkey |
|                                             | <b>I1222T</b> | America (Mexico)              | KU922923; KU922960                                                                                                                                             | ZIKV infection                            |
|                                             |               | America (Martinique)          | KU647676                                                                                                                                                       | ZIKV infection                            |
|                                             |               | Asia (Thailand)               | KU681081                                                                                                                                                       |                                           |
|                                             | <b>I1222V</b> | Africa                        | KU720415; LC002520; KF383119; KF383118; KF383117; KF383116; KF383115; HQ234501; HQ234500; HQ234498; NC012532; KF268950; KF268949; KF268948; AY632535; DQ859059 | Mosquitoes, cell culture, sentinel monkey |
|                                             | <b>F1237L</b> | Africa                        | KF383119; KF383118                                                                                                                                             | Mosquitoes                                |
|                                             | <b>L1255F</b> | America (Brazil)              | KU497555                                                                                                                                                       | Microcephaly                              |
|                                             | <b>D1266E</b> | Africa                        | KF383117; KF383116; HQ234501; HQ234500                                                                                                                         | Mosquitoes, cell culture, sentinel monkey |
|                                             | <b>L1270P</b> | Asia (Cambodia)               | JN860885                                                                                                                                                       | ZIKV infection                            |

|               |                   |                                                                                                                                                                                     |                                                 |
|---------------|-------------------|-------------------------------------------------------------------------------------------------------------------------------------------------------------------------------------|-------------------------------------------------|
| <b>I1271V</b> | Africa            | KF383119; KF383118;<br>KF383117; KF383116;<br>KF383115; HQ234501;<br>HQ234500; KF268950;<br>KF268949; KF268948;<br>DQ859059                                                         | Mosquitoes, cell<br>culture, sentinel<br>monkey |
| <b>I1281V</b> | Asia (China)      | KU820898; KU740184                                                                                                                                                                  | ZIKV infection                                  |
|               | Asia (Malaysia)   | HQ234499                                                                                                                                                                            | Cell culture                                    |
| <b>V1285A</b> | Africa            | KU720415; LC002520;<br>KF383119; KF383118;<br>KF383117; KF383116;<br>KF383115; HQ234501;<br>HQ234500; HQ234498;<br>NC012532; KF268950;<br>KF268949; KF268948;<br>AY632535; DQ859059 | Mosquitoes, cell<br>culture, sentinel<br>monkey |
| <b>T1293A</b> | Africa            | KU720415; LC002520;<br>KF383119; KF383118;<br>KF383117; KF383116;<br>KF383115; HQ234501;<br>HQ234500; HQ234498;<br>NC012532; KF268950;<br>KF268949; KF268948;<br>AY632535; DQ859059 | Mosquitoes, cell<br>culture, sentinel<br>monkey |
| <b>A1295P</b> | Africa            | KU720415; LC002520;<br>HQ234498; NC012532;<br>AY632535                                                                                                                              | Mosquitoes, cell<br>culture, sentinel<br>monkey |
| <b>I1296T</b> | Africa            | KF383117                                                                                                                                                                            | Mosquitoes                                      |
| <b>I1296V</b> | Africa            | KF268949                                                                                                                                                                            | Mosquitoes                                      |
| <b>A1298T</b> | Asia (Micronesia) | EU545988                                                                                                                                                                            | ZIKV infection                                  |
| <b>V1310M</b> | America (Brazil)  | KU940227                                                                                                                                                                            | Unknown                                         |
| <b>F1322I</b> | Africa            | KU720415; LC002520;<br>HQ234498; NC012532;<br>AY632535                                                                                                                              | Mosquitoes, cell<br>culture, sentinel<br>monkey |
| <b>L1325I</b> | Africa            | HQ234500                                                                                                                                                                            | Cell culture                                    |
| <b>M1341A</b> | Africa            | DQ859059                                                                                                                                                                            | Mosquitoes, cell<br>culture                     |
| <b>L1345M</b> | Africa            | KF383115                                                                                                                                                                            | Mosquitoes                                      |
| <b>T1346A</b> | Africa            | KF383117                                                                                                                                                                            | Mosquitoes                                      |
| <b>L1350V</b> | Africa            | KU720415; LC002520;<br>KF383119; KF383118;<br>HQ234498; NC012532;<br>AY632535                                                                                                       | Mosquitoes, cell<br>culture, sentinel<br>monkey |
| <b>L1350I</b> | Africa            | KF383117; KF383116;<br>KF383115; HQ234501;<br>HQ234500; KF268950;<br>KF268949; KF268948;<br>DQ859059                                                                                | Mosquitoes, cell<br>culture, sentinel<br>monkey |

**Table S6:** Mutations in NS2B protein of ZIKV, according to protein structural regions, geographical origin, sequence accession number in Genbank and clinical data, when available.

| Aminoacid location on the protein structure | Mutations     | Geographical origin (Country) | Sequence accession number in Genbank                                                                                                                           | Host                                       |
|---------------------------------------------|---------------|-------------------------------|----------------------------------------------------------------------------------------------------------------------------------------------------------------|--------------------------------------------|
|                                             | <b>M1400I</b> | America (Brazil)              | KU926309                                                                                                                                                       | ZIKV infection                             |
|                                             |               |                               | KU729217                                                                                                                                                       | Microcephaly                               |
|                                             | <b>S1413T</b> | Africa                        | HQ234500                                                                                                                                                       | Cell Culture                               |
|                                             | <b>V1435I</b> | Asia (Philippines)            | KU681082                                                                                                                                                       | ZIKV infection                             |
|                                             | <b>D1457E</b> | Africa                        | KU720415; LC002520; KF383119; KF383118; KF383117; KF383116; KF383115; HQ234501; HQ234500; HQ234498; NC012532; KF268950; KF268949; KF268948; AY632535; DQ859059 | Mosquitoes, cell culture, sentinel monkeys |
|                                             | <b>T1473A</b> | Africa                        | KU720415; LC002520; KF383119; KF383118; KF383117; KF383116; KF383115; HQ234501; HQ234500; HQ234498; NC012532; KF268950; KF268949; KF268948; AY632535; DQ859059 | Mosquitoes, cell culture, sentinel monkeys |

**Table S7:** Mutations in NS3 protein of ZIKV, according to protein structural regions, geographical origin, sequence accession number in Genbank and clinical data, when available.

| Aminoacid location on the protein structure | Mutations <sup>1</sup> | Geographical origin (Country) | Sequence accession number in Genbank                                 | Host                                      |
|---------------------------------------------|------------------------|-------------------------------|----------------------------------------------------------------------|-------------------------------------------|
| NS3pro                                      | <b>A56(1554)S</b>      | Africa                        | All African sequences                                                | Mosquitoes, cell culture, sentinel monkey |
|                                             | <b>A88(1586)T</b>      | Africa                        | KF383117                                                             | Mosquitoes, cell culture                  |
|                                             | <b>L92(1590)H</b>      | Africa                        | All African sequences, except for: NC012532;DQ859059                 | Mosquitoes, cell culture, sentinel monkey |
|                                             | <b>L92(1590)V</b>      | Africa                        | DQ859059                                                             | Mosquitoes, cell culture                  |
|                                             | <b>A106(1604)E</b>     | America (Mexico)              | KU922960;KU922923                                                    | ZIKV infection                            |
|                                             | <b>R107(1605)K</b>     | Africa                        | HQ234500                                                             | Cell culture                              |
|                                             | <b>L112(1610)P</b>     | Asia (Micronesia)             | EU545988                                                             | ZIKV infection                            |
|                                             | <b>I115(1613)T</b>     | Asia (Philippines)            | KU681082                                                             | ZIKV infection                            |
|                                             | <b>D120(1618)G</b>     | America (Brazil)              | KU940224; KU940228                                                   | Unknown                                   |
|                                             | <b>K169(1667)R</b>     | Africa                        | All African sequences                                                | Mosquitoes, cell culture, sentinel monkey |
| Linker                                      | <b>T174(1672)A</b>     | Africa                        | KF383117; KF383116; HQ234501                                         | Mosquitoes, cell culture                  |
|                                             | <b>K185(1683)R</b>     | Africa                        | KF383117; KF383116; HQ234501; HQ234500                               | Mosquitoes, cell culture                  |
| NS3hel                                      | <b>K215(1713)T</b>     | Africa                        | All African sequences                                                | Mosquitoes, cell culture, sentinel monkey |
|                                             | <b>V220(1718)L</b>     | Africa                        | KF383116                                                             | Mosquitoes                                |
|                                             | <b>N249(1747)K</b>     | Africa                        | DQ859059                                                             | Cell culture                              |
|                                             | <b>N282(1780)Y</b>     | Africa                        | KF383119; KF383118; KF383117; KF383116; KF383115; AY632535;NC012532; | Mosquitoes, sentinel monkey               |
|                                             | <b>M334(1832)T</b>     | America (Brazil)              | KU729218                                                             | Fatal ZIKV infection                      |
|                                             | <b>S347(1845)T</b>     | Asia (Philippines)            | KU681082                                                             | ZIKV infection& cell culture              |
|                                             | <b>D354(1852)E</b>     | America (Chi/ Ven)            | KU744693                                                             | ZIKV infection                            |
|                                             | <b>H355(1853)Y</b>     | America (Chi/Ven)             | KU744693                                                             | ZIKV infection                            |
|                                             | <b>V360(1858)I</b>     | Africa                        | KF383117; KF383116; HQ234501; HQ234500                               | Mosquitoes                                |
|                                             | <b>S365(1863)R</b>     | America (Chi/Ven)             | KU744693                                                             | ZIKV infection                            |
|                                             | <b>N398(1866)S</b>     | Africa                        | KF383118; KF383116                                                   | Mosquitoes                                |
|                                             | <b>N370(1868)E</b>     | Africa                        | KF383118; KF383116                                                   | Mosquitoes                                |

|                    |                     |                                                                |                                           |
|--------------------|---------------------|----------------------------------------------------------------|-------------------------------------------|
| <b>I372(1870)S</b> | Africa              | KF383118; KF383116                                             | Mosquitoes                                |
| <b>A373(1871)T</b> | Africa              | KF383115                                                       | Mosquitoes                                |
| <b>Q396(1894)L</b> | Asia (Micronesia)   | EU545988                                                       | ZIKV infection                            |
|                    | Asia (Malaysia)     | HQ234499                                                       | Cell culture                              |
|                    | Asia (Philippines)  | KU681082                                                       | ZIKV infection& cell culture              |
| <b>H400(1898)N</b> | Asia (Micronesia)   | EU545988                                                       | ZIKV infection                            |
|                    | Africa              | All African sequences                                          | Mosquitoes, sentinel monkey, cell culture |
| <b>V407(1905)I</b> | Africa              | All African sequences                                          | Mosquitoes, sentinel monkey, cell culture |
| <b>D436(1934)G</b> | America (Chi/ Ven)  | KU744693                                                       | ZIKV infection                            |
| <b>I460(1958)V</b> | Africa              | HQ234501                                                       | Mosquitoes                                |
|                    | Asia (Malaysia)     | HQ234499                                                       | Cell culture                              |
| <b>M472(1970)L</b> | Africa              | All African sequences                                          | Mosquitoes, cell culture, sentinel monkey |
| <b>D483(1981)G</b> | Africa              | KU720415; LC002520<br>KF383119; KF268948<br>AY632535; NC012532 | Mosquitoes, sentinel monkey               |
| <b>R525(2023)K</b> | Asia (Chi/Sam)      | KU866423                                                       | ZIKV infection                            |
| <b>K537(2035)R</b> | America (Brazil)    | KU926309                                                       | ZIKV infection                            |
| <b>R560(2058)K</b> | Asia (Micronesia)   | EU545988                                                       | ZIKV infection                            |
|                    | Asia (Thailand)     | KU681081                                                       | Cell culture                              |
| <b>T567(2065)M</b> | Asia (Philippines)  | KU681082                                                       | ZIKV infection                            |
| <b>M572(2070)L</b> | America (Guatemala) | KU501216; KU501217                                             | ZIKV infection                            |
| <b>R583(2081)K</b> | Africa              | All African sequences                                          | Mosquitoes, sentinel monkey, cell culture |
|                    | Asia (Malaysia)     | HQ234499                                                       | Cell culture                              |
|                    | Asia (Philippines)  | KU681082                                                       | ZIKV infection                            |
| <b>Y584(2082)H</b> | Asia (Micronesia)   | EU545988                                                       | ZIKV infection                            |
|                    | Africa              | All African sequences                                          | Mosquitoes, sentinel monkey, cell culture |

<sup>1</sup>: Mutations according to the PBD numbering in bold letter, and polyprotein numbering in brackets (uniprot entry Q32ZE10).

**Table S8:** Mutations in NS4A protein of ZIKV, according to protein structural regions, geographical origin, sequence accession number in Genbank and clinical data, when available.

| Aminoacid location on the protein structure | Mutations     | Geographical origin (Country) | Sequence accession number in Genbank                                                                                                                           | Host                                      |
|---------------------------------------------|---------------|-------------------------------|----------------------------------------------------------------------------------------------------------------------------------------------------------------|-------------------------------------------|
|                                             | <b>A2117V</b> | Africa                        | KF268950; KF268948                                                                                                                                             | Mosquitoes                                |
|                                             | <b>A2118T</b> | America (Brazil)              | KU926310                                                                                                                                                       | ZIKV infection                            |
|                                             |               | America (Brazil)              | KU940228; KU940224                                                                                                                                             | ZIKV infection                            |
|                                             | <b>F2119L</b> | Africa                        | KU720415; LC002520; KF383119; KF383118; KF383117; KF383116; KF383115; HQ234501; HQ234500; HQ234498; NC012532; KF268950; KF268949; KF268948; AY632535; DQ859059 | Mosquitoes, cell culture, sentinel monkey |
|                                             | <b>M2122I</b> | Asia (Philipines)             | KU681082                                                                                                                                                       | ZIKV infection                            |
|                                             | <b>E2123D</b> | Africa                        | KF383117; KF383116; HQ234501; HQ234500                                                                                                                         | Mosquitoes, cell culture, sentinel monkey |
|                                             | <b>K2157E</b> | Asia (Micronesia)             | EU545988                                                                                                                                                       | ZIKV infection                            |
|                                             | <b>Q2162P</b> | Africa                        | KF383115                                                                                                                                                       | Mosquitoes                                |
|                                             | <b>L2163M</b> | America (Brazil)              | KU940228; KU940227; KU940224                                                                                                                                   | Unkown                                    |
|                                             | <b>I2193M</b> | Asia (Philipines)             | KU681082                                                                                                                                                       | ZIKV infection                            |
|                                             | <b>G2199E</b> | Africa                        | DQ859059                                                                                                                                                       | Cell culture                              |



**Table S9:** Mutations in NS4B protein of ZIKV, according to protein structural regions, geographical origin, sequence accession number in Genbank and clinical data, when available.

| Aminoacid location on the protein structure | Mutations                 | Geographical origin (Country) | Sequence accession number in Genbank                                                                                                                           | Host                                      |
|---------------------------------------------|---------------------------|-------------------------------|----------------------------------------------------------------------------------------------------------------------------------------------------------------|-------------------------------------------|
|                                             | <b>V2255I<sup>1</sup></b> | Asia (Micronesia)             | EU545988                                                                                                                                                       | ZIKV infection                            |
|                                             | <b>S2276N</b>             | Africa                        | KU720415; LC002520; KF383119; KF383118; KF383115; HQ234498; NC012532; KF268950; KF268949; KF268948; AY632535; DQ859059                                         | Mosquitoes, cell culture, sentinel monkey |
|                                             | <b>L2278I</b>             | Africa                        | KU720415; LC002520; KF383119; KF383118; KF383117; KF383116; KF383115; HQ234501; HQ234500; HQ234498; NC012532; KF268950; KF268949; KF268948; AY632535; DQ859059 | Mosquitoes, cell culture, sentinel monkey |
|                                             | <b>S2279G</b>             | Asia (Malaysia)               | HQ234499                                                                                                                                                       | Cell culture                              |
|                                             | <b>S2279A</b>             | Africa                        | KU720415; LC002520; KF383119; KF383118; KF383117; KF383116; KF383115; HQ234501; HQ234500; HQ234498; NC012532; KF268950; KF268949; KF268948; AY632535; DQ859059 | Mosquitoes, cell culture, sentinel monkey |
|                                             | <b>H2280Y</b>             | Africa                        | KF383117                                                                                                                                                       | Mosquitoes                                |
|                                             | <b>R2284K</b>             | Africa                        | DQ859059                                                                                                                                                       | Mosquitoes, cell culture                  |
|                                             | <b>R2285K</b>             | Africa                        | KF383117; KF383116; HQ234501; HQ23450                                                                                                                          | Mosquitoes, cell culture, sentinel monkey |
|                                             | <b>A2289T</b>             | Africa                        | KF383117; KF383116; HQ234501; HQ234500; AY632535                                                                                                               | Mosquitoes, cell culture, sentinel monkey |
|                                             | <b>A2289V</b>             | Africa                        | KF383115; KF268950; KF268949; KF268948                                                                                                                         | Mosquitoes, cell culture, sentinel monkey |
|                                             | <b>I2291M</b>             | America (Brazil)              | KU321639                                                                                                                                                       | ZIKV infection                            |
|                                             |                           | America (Haiti)               | KU509998                                                                                                                                                       | ZIKV infection                            |
|                                             |                           | America (Chi/Ven)             | KU744693                                                                                                                                                       | ZIKV infection                            |
|                                             |                           | Asia (Malaysia)               | HQ234499                                                                                                                                                       | Cell culture                              |
|                                             |                           | Africa                        | KU720415; LC002520; KF383119; KF383118; KF383115; HQ234501; HQ234498; NC012532; KF268950; KF268949; KF268948; AY632535                                         | Mosquitoes, cell culture, sentinel monkey |

|               |                    |                                                                                                                                                                |                                           |
|---------------|--------------------|----------------------------------------------------------------------------------------------------------------------------------------------------------------|-------------------------------------------|
| <b>I2291T</b> | Asia (Philippines) | KU681082                                                                                                                                                       | ZIKV infection                            |
| <b>I2291V</b> | Africa             | HQ234500; DQ859059                                                                                                                                             | Mosquitoes, cell culture                  |
| <b>A2309P</b> | America (Chi/Ven)  | KU744693                                                                                                                                                       | ZIKV infection                            |
| <b>T2313S</b> | America (Chi/Ven)  | KU744693                                                                                                                                                       | ZIKV infection                            |
|               | Asia (Malaysia)    | HQ234499                                                                                                                                                       | Cell culture                              |
| <b>F2314L</b> | Africa             | KU720415; LC002520; KF383119; KF383118; KF383117; KF383116; KF383115; HQ234501; HQ234500; HQ234498; NC012532; KF268950; KF268949; KF268948; AY632535; DQ859059 | Mosquitoes, cell culture, sentinel monkey |
| <b>F2356L</b> | Africa             | KU720415; LC002520; KF383118; HQ234498; NC012532; AY632535; DQ859059                                                                                           | Mosquitoes, cell culture, sentinel monkey |
|               | Asia (Malaysia)    | HQ234499                                                                                                                                                       | Cell culture                              |
|               | Asia (Philippines) | KU681082                                                                                                                                                       | ZIKV infection                            |
|               | Asia (Micronesia)  | EU545988                                                                                                                                                       | ZIKV infection                            |
| <b>I2363M</b> | Africa             | KU720415; LC002520; KF383119; KF383118; KF383116; KF383115; HQ234501; HQ234500; HQ234498; NC012532; KF268950; KF268948; AY632535; DQ859059                     | Mosquitoes, cell culture, sentinel monkey |
| <b>I2363V</b> | Africa             | KF268949                                                                                                                                                       | Mosquitoes                                |
| <b>D2415E</b> | America (Chi/Ven)  | KU744693                                                                                                                                                       | ZIKV infection                            |
| <b>P2429H</b> | Asia (Micronesia)  | EU545988                                                                                                                                                       | ZIKV infection                            |
| <b>Q2430R</b> | Asia (Micronesia)  | EU545988                                                                                                                                                       | ZIKV infection                            |
|               | America (Haiti)    | KU509998                                                                                                                                                       | ZIKV infection                            |
| <b>I2441M</b> | America (Brazil)   | KU321639                                                                                                                                                       | ZIKV infection                            |
|               | America (Chi/Ven)  | KU744693                                                                                                                                                       | ZIKV infection                            |
|               | Asia (Malaysia)    | HQ234499                                                                                                                                                       | Cell culture                              |
| <b>V2445I</b> | Africa             | KU720415; LC002520; KF383119; KF383118; KF383115; HQ234498; NC012532; KF268950; KF268949; KF268948; AY632535                                                   | Mosquitoes, cell culture, sentinel monkey |
| <b>V2445A</b> | Africa             | HQ234500                                                                                                                                                       | Cell culture                              |
| <b>I2449V</b> | Asia (Malaysia)    | HQ234499                                                                                                                                                       | Cell culture                              |

|               |                  |                                                                                                                                                                                     |                                                 |
|---------------|------------------|-------------------------------------------------------------------------------------------------------------------------------------------------------------------------------------|-------------------------------------------------|
|               | Africa           | KU720415; LC002520;<br>KF383119; KF383118;<br>KF383117; KF383116;<br>KF383115; HQ234501;<br>HQ234500; HQ234498;<br>NC012532; KF268950;<br>KF268949; KF268948;<br>AY632535; DQ859059 | Mosquitoes, cell<br>culture, sentinel<br>monkey |
|               | Asia (Malaysia)  | HQ234499                                                                                                                                                                            | Cell culture                                    |
| <b>S2451L</b> | Africa           | KU720415; LC002520;<br>KF383119; KF383118;<br>KF383117; KF383116;<br>KF383115; HQ234501;<br>HQ234500; HQ234498;<br>NC012532; KF268950;<br>KF268949; KF268948;<br>AY632535; DQ859059 | Mosquitoes, cell<br>culture, sentinel<br>monkey |
| <b>W2455G</b> | Africa           | KF383117                                                                                                                                                                            | Mosquitoes                                      |
| <b>T2505I</b> | America (Brazil) | KU527068                                                                                                                                                                            | Microcephaly                                    |

<sup>1</sup>Mutation belonging to the peptide 2K.

**Table S10:** Mutations in NS5 protein of ZIKV, according to protein structural regions, geographical origin, sequence accession number in Genbank and clinical data, when available.

| Aminoacid location on the protein structure | Mutations <sup>1</sup> | Geographical origin (Country) | Sequence accession number in Genbank                                                                       | Host                                      |
|---------------------------------------------|------------------------|-------------------------------|------------------------------------------------------------------------------------------------------------|-------------------------------------------|
| MTase Domain                                | <b>D46(2562)N</b>      | Africa                        | KF268949                                                                                                   | Mosquitoes                                |
|                                             | <b>L62(2578)I</b>      | Africa                        | AY632535; NC012532                                                                                         | Sentinel monkey, cell culture, mosquitoes |
|                                             | <b>V66(2582)E</b>      | Africa                        | AY632535; NC012532                                                                                         | Sentinel monkey, cell culture, mosquitoes |
|                                             |                        | America (Brazil)              | KU940228; KU940227<br>KU940224;                                                                            | Unknown                                   |
|                                             | <b>Y74(2590)H</b>      | Africa                        | KF383119; KF383118<br>KF383117; KF383116<br>KF383115; HQ234500<br>HQ234501; KF268950<br>KF268949; KF268948 | Cell culture, mosquitoes                  |
|                                             | <b>V78(2594)I</b>      | Africa                        | All African sequences, except for: HQ234501; HQ234500                                                      | Sentinel monkey, cell culture, mosquitoes |
|                                             | <b>A91(2607)V</b>      | America (Puerto Rico)         | KU501215                                                                                                   | ZIKV infection                            |
|                                             | <b>K101(2617)R</b>     | Africa                        | All African sequences, except for: KF268950 KF268949; KF268948                                             | Sentinel monkey, cell culture, mosquitoes |
|                                             |                        | Africa                        | All African sequences                                                                                      | Sentinel monkey, cell culture, mosquitoes |
|                                             |                        | Asia (Thailand)               | KU681081                                                                                                   | Cell culture                              |
|                                             |                        | Asia (Chi/Sam)                | KU866423                                                                                                   | ZIKV infection                            |
|                                             |                        | Asia (Philippines)            | KU681082                                                                                                   | ZIKV infection & cell culture             |
|                                             | <b>M114(2630)V</b>     | Asia (Can/Thai)               | KF993678                                                                                                   | ZIKV infection                            |
|                                             |                        | Asia (French Pol)             | KJ776791                                                                                                   | ZIKV infection                            |
|                                             |                        | Asia (Cambodia)               | JN860885                                                                                                   | ZIKV infection                            |
|                                             |                        | Asia (Micronesia)             | EU545988                                                                                                   | ZIKV infection                            |
|                                             |                        | Asia (China)                  | KU820899                                                                                                   | ZIKV infection                            |
|                                             | <b>M114(2630)T</b>     | Asia (Malaysia)               | HQ234499                                                                                                   | Cell culture                              |

|                       |                    |                     |                              |                                           |
|-----------------------|--------------------|---------------------|------------------------------|-------------------------------------------|
|                       | <b>V124(2640)I</b> | Asia (Chi/Sam)      | KU866423                     | ZIKV infection                            |
|                       |                    | Africa              | DQ859059                     | Cell culture                              |
|                       | <b>P139(2655)S</b> | Asia (Malaysia)     | HQ234499                     | Cell culture                              |
|                       |                    | Africa              | DQ859059                     | Cell culture                              |
|                       | <b>A159(2675)T</b> | Africa              | All African sequences        | Sentinel monkey, cell culture, mosquitoes |
|                       | <b>V168(2684)A</b> | America (Brazil)    | KU926310                     | ZIKV infection                            |
|                       | <b>G169(2685)E</b> | Africa              | KF383117                     | Mosquitoes                                |
|                       | <b>K174(2690)R</b> | America (Guatemala) | KU501216; KU501217           | ZIKV infection                            |
|                       | <b>I181(2697)V</b> | Asia (Thailand)     | KU681081                     | ZIKV infection & cell culture             |
|                       | <b>L195(2711)M</b> | Africa              | All African sequences        | Sentinel monkey, cell culture, mosquitoes |
|                       | <b>Y202(2718)H</b> | Africa              | All African sequences        | Sentinel monkey, cell culture, mosquitoes |
|                       | <b>C212(2728)S</b> | Africa              | AY632535; NC012532           | Sentinel monkey                           |
|                       |                    | Asia (China)        | KU820898; KU740184           | ZIKV infection                            |
|                       | <b>T229(2745)I</b> | Africa              | All African sequences        | Sentinel monkey, cell culture, mosquitoes |
|                       |                    | Asia (Malaysia)     | HQ234499                     | Cell culture                              |
|                       | <b>T229(2745)V</b> | Africa              | KF268950; KF268948           | Mosquitoes                                |
|                       | <b>D245(2761)E</b> | Africa              | HQ234501                     | Cell culture                              |
| Linker                | <b>N259(2775)D</b> | America (Brazil)    | KU365777; KU365780           | ZIKV infection                            |
|                       |                    | Asia (China)        | KU820898; KU740184           | ZIKV infection                            |
|                       | <b>V267(2783)A</b> | Africa              | All African sequences        | Sentinel monkey, cell culture, mosquitoes |
|                       |                    | Asia (Malaysia)     | HQ234499                     | Cell culture                              |
| RdRp domain (Fingers) | <b>M275(2791)L</b> | Asia (Malaysia)     | HQ234499                     | Cell culture                              |
|                       | <b>I277(2793)V</b> | Africa              | KF268950; KF268948; DQ859059 | Mosquitoes, cell culture                  |

|                              |                   |                                                                                                                                  |                                           |
|------------------------------|-------------------|----------------------------------------------------------------------------------------------------------------------------------|-------------------------------------------|
|                              |                   | KU720415; LC002520<br>KF383119; KF383118<br>KF383117; KF383116<br>HQ234501; HQ234500<br>HQ234498; NC012532<br>AY632535; DQ859059 | Sentinel monkey, cell culture, mosquitoes |
| <b>N280(2796)R</b>           | Africa            |                                                                                                                                  |                                           |
| <b>N280(2796)D</b>           | America (Brazil)  | KU729217                                                                                                                         | Microcephaly                              |
| <b>N280(2796)K</b>           | Africa            | KF383115; KF268950<br>KF268949; KF268948                                                                                         | Mosquitoes                                |
| <b>I282(2798)V</b>           | Asia (Malaysia)   | HQ234499                                                                                                                         | Cell culture                              |
| <b>S287(2803)N</b>           | America (Chi/Ven) | KU744693                                                                                                                         | ZIKV infection                            |
| <b>S287(2803)A</b>           | Africa            | All African sequences                                                                                                            | Sentinel monkey, cell culture, mosquitoes |
| <b>H289(2805)Q</b>           | America (Mexico)  | KU922960; KU922923                                                                                                               | ZIKV infection                            |
| <b>H289(2805)K</b>           | America (Chi/Ven) | KU744693                                                                                                                         | ZIKV infection                            |
|                              |                   | KU720415; LC002520<br>KF383119; KF383118<br>HQ234498; NC012532<br>AY632535                                                       | Sentinel monkey, mosquitoes               |
| <b>F295(2811)L</b>           | Africa            |                                                                                                                                  |                                           |
| <b>E311(2827)D</b>           | America (Chi/Ven) | KU744693                                                                                                                         | ZIKV infection                            |
| <b>E311(2827)V</b>           | America (Brazil)  | KU497555                                                                                                                         | Microcephaly                              |
| <b>P313(2829)A</b>           | America (Chi/Ven) | KU744693                                                                                                                         | ZIKV infection                            |
|                              |                   | KU720415; LC002520<br>KF383119; KF383118<br>HQ234498; AY632535<br>NC012532                                                       | Sentinel monkey, cell culture, mosquitoes |
| <b>K438(2954)R</b>           | Africa            |                                                                                                                                  |                                           |
| <b>Q449(2965)H</b>           | Africa            | All African sequences                                                                                                            | Sentinel monkey, cell culture, mosquitoes |
| <b>N454(2970)I</b>           | America (Chi/Ven) | KU744693                                                                                                                         | ZIKV infection                            |
| <b>M455(2971)T</b>           | America (Chi/Ven) | KU744693                                                                                                                         | ZIKV infection                            |
| <b>A489(3005)S</b>           | Africa            | KF383118; KF383115                                                                                                               | Mosquitoes                                |
| <b>R545(3061)K</b>           | Africa            | All African sequences                                                                                                            | Sentinel monkey, cell culture, mosquitoes |
| <b>E559(3075)D</b>           | Africa            | DQ859059                                                                                                                         | Cell culture                              |
| <b>K560(3076)E</b>           | Africa            | All African sequences                                                                                                            | Sentinel monkey, cell culture, mosquitoes |
|                              |                   | KU720415; LC002520<br>KF383119; KF383118<br>HQ234498; AY632535<br>NC012532; DQ859059                                             | Sentinel monkey, cell culture, mosquitoes |
| <b>A564(3080)T</b>           | Africa            |                                                                                                                                  |                                           |
| <b>I569(3085)V</b>           | Africa            | All African sequences                                                                                                            | Sentinel monkey, cell culture, mosquitoes |
| <b>K587(3103)R</b>           | Asia (Malaysia)   | HQ234499                                                                                                                         | Cell culture                              |
| <b>K587(3103)G</b>           | Africa            | All African sequences                                                                                                            | Sentinel monkey, cell culture, mosquitoes |
| RdRp domain ( $\alpha$ -NLS) | America (Brazil)  | KU940228; KU940227<br>KU940224                                                                                                   | Unknown                                   |
| <b>V322(2838)I</b>           | America (Dom Rep) | KU853012; KU853013                                                                                                               | ZIKV infection                            |
|                              | Africa            | All African sequences                                                                                                            | Sentinel monkey, cell culture, mosquitoes |

|                                           |                       |                                 |                                                                |                                           |
|-------------------------------------------|-----------------------|---------------------------------|----------------------------------------------------------------|-------------------------------------------|
| RdRp domain<br>( $\alpha$ , $\beta$ -NLS) | <b>Q373(2889)R</b>    | Africa                          | HQ234500                                                       | Mosquitoes                                |
|                                           | <b>V374(2890)I</b>    | Asia<br>(Can/ Thai)             | KF993678                                                       | ZIKV infection                            |
|                                           | <b>V374(2890)T</b>    | Africa                          | KF268949                                                       | Mosquitoes                                |
|                                           | <b>V374(2890)A</b>    | Africa                          | KF268950; KF268948                                             | Mosquitoes                                |
|                                           | <b>S376(2892)N</b>    | Africa                          | All African sequences                                          | Sentinel monkey, cell culture, mosquitoes |
|                                           |                       | Asia (Malaysia)                 | HQ234499                                                       | Cell culture                              |
|                                           | <b>M377(2893)I</b>    | Africa                          | KU720415; LC002520<br>KF383117; HQ234498<br>AY632535; NC012532 | Sentinel monkey, cell culture, mosquitoes |
|                                           | <b>S379(2895)A</b>    | Africa                          | DQ859059                                                       | Cell culture                              |
|                                           | <b>H389(2905)R</b>    | Africa                          | All African sequences                                          | Sentinel monkey, cell culture, mosquitoes |
|                                           | RdRp domain<br>(Palm) | <b>G510(3026)V</b>              | America (Mexico)                                               | KU922960; KU922923                        |
| <b>V519(3035)I</b>                        |                       | Africa                          | All African sequences                                          | Sentinel monkey, cell culture, mosquitoes |
| <b>S524(3040)N</b>                        |                       | Africa                          | All African sequences                                          | Sentinel monkey, cell culture, mosquitoes |
| <b>R525(3041)Q</b>                        |                       | Africa                          | KF383119; KF383118                                             | Mosquitoes                                |
| <b>R525(3041)C</b>                        |                       | America (Guatemala)             | KU501216; KU501217                                             | ZIKV infection                            |
| <b>I526(3042)A</b>                        |                       | Africa                          | All African sequences                                          | Sentinel monkey, cell culture, mosquitoes |
| <b>I526(3042)T</b>                        |                       | Asia (Malaysia)                 | HQ234499                                                       | Cell culture                              |
| <b>R530(3046)K</b>                        |                       | Africa                          | All African sequences                                          | Sentinel monkey, cell culture, mosquitoes |
|                                           |                       | Asia (Malaysia)                 | HQ234499                                                       | Cell culture                              |
| <b>N624(3140)S</b>                        |                       | Asia (China)                    | KU820899                                                       | ZIKV infection                            |
| <b>D634(3150)Q</b>                        |                       | Africa                          | HQ234501; HQ234500<br>KF383117; KF383116                       | Mosquitoes                                |
| <b>R641(3157)K</b>                        |                       | Africa                          | All African sequences                                          | Sentinel monkey, cell culture, mosquitoes |
| <b>S642(3158)P</b>                        |                       | Africa                          | All African sequences                                          | Sentinel monkey, cell culture, mosquitoes |
| <b>N647(3163)R</b>                        |                       | Africa                          | All African sequences                                          | Sentinel monkey, cell culture, mosquitoes |
| <b>S651(3167)C</b>                        |                       | Africa                          | KF268950; KF268949;<br>KF268948                                | Mosquitoes                                |
| <b>N652(3168)S</b>                        |                       | Africa                          | DQ859059                                                       | Cell culture                              |
| <b>R656(3172)G</b>                        |                       | Africa                          | KF383119                                                       | Mosquitoes                                |
| <b>K670(3186)R</b>                        |                       | Asia (Chi/Sam)                  | KU866423; KU820899                                             | ZIKV infection                            |
| <b>H678(3194)C</b>                        |                       | Africa                          | KF383115                                                       | Mosquitoes                                |
| <b>A679(3195)C</b>                        |                       | Africa                          | KF383115                                                       | Mosquitoes                                |
| <b>S651(3167)C</b>                        | Africa                | KF268950; KF268949;<br>KF268948 | Mosquitoes                                                     |                                           |
| <b>N652(3168)S</b>                        | Africa                | DQ859059                        | Cell culture                                                   |                                           |
| <b>R656(3172)G</b>                        | Africa                | KF383119                        | Mosquitoes                                                     |                                           |

|                               |                             |                      |                                                                                      |                                           |
|-------------------------------|-----------------------------|----------------------|--------------------------------------------------------------------------------------|-------------------------------------------|
|                               | <b>K670</b> (3186) <b>R</b> | Asia (Chi/Sam)       | KU866423; KU820899                                                                   | ZIKV infection                            |
|                               | <b>H678</b> (3194) <b>C</b> | Africa               | KF383115                                                                             | Mosquitoes                                |
|                               | <b>A679</b> (3195) <b>C</b> | Africa               | KF383115                                                                             | Mosquitoes                                |
| RdRp domain<br>(Thumb)        | <b>D703</b> (3219) <b>S</b> | Africa               | All African sequences                                                                | Sentinel monkey, cell culture, mosquitoes |
|                               | <b>H719</b> (3235) <b>Y</b> | Africa               | KU720415; LC002520<br>KF383119; KF383118<br>HQ234498; AY632535<br>NC012532; HQ234498 | Sentinel monkey, cell culture, mosquitoes |
|                               |                             | Asia (Malaysia)      | HQ234499                                                                             | Cell culture                              |
|                               | <b>R771</b> (3287) <b>K</b> | Africa               | KF383116                                                                             | Mosquitoes                                |
|                               | <b>T808</b> (3324) <b>N</b> | Africa               | HQ234500                                                                             | Mosquitoes                                |
|                               | <b>M813</b> (3329) <b>V</b> | Africa               | All African sequences                                                                | Sentinel monkey, cell culture, mosquitoes |
|                               | <b>V814</b> (3330) <b>A</b> | America (Chi/Ven)    | KU744693                                                                             | ZIKV infection                            |
|                               | <b>E827</b> (3343) <b>G</b> | Africa               | HQ234500                                                                             | Mosquitoes                                |
|                               | <b>T833</b> (3349) <b>P</b> | America (Martinique) | KU647676                                                                             | ZIKV infection                            |
|                               |                             | Africa               | KF383117                                                                             | Mosquitoes                                |
|                               | <b>T833</b> (3349) <b>A</b> | America (Colombia)   | KU820897                                                                             | ZIKV infection                            |
|                               | <b>D837</b> (3353) <b>E</b> | Africa               | KF383117                                                                             | Mosquitoes                                |
|                               | <b>D846</b> (3362) <b>S</b> | Africa               | KF383117                                                                             | Mosquitoes                                |
|                               | <b>S851</b> (3367) <b>Y</b> | Africa               | KF383117                                                                             | Mosquitoes                                |
|                               | <b>L852</b> (3368) <b>I</b> | Africa               | KF383117                                                                             | Mosquitoes                                |
|                               | <b>D867</b> (3383) <b>N</b> | Africa               | All African sequences                                                                | Sentinel monkey, cell culture, mosquitoes |
|                               | <b>N870</b> (3386) <b>S</b> | Africa               | DQ859059                                                                             | Cell culture                              |
|                               |                             | Asia (Micronesia)    | EU545988                                                                             | ZIKV infection                            |
|                               | <b>V872</b> (3388) <b>M</b> | Asia (Philippines)   | KU681082                                                                             | ZIKV infection & cell culture             |
|                               |                             | Asia (Cambodia)      | JN860885                                                                             | ZIKV infection                            |
|                               |                             | Asia (Chi/Sam)       | KU866423                                                                             | ZIKV infection                            |
|                               | <b>R873</b> (3389) <b>L</b> | Africa               | KF383117                                                                             | Mosquitoes                                |
|                               | <b>I875</b> (3391) <b>L</b> | Africa               | KF383117                                                                             | Mosquitoes                                |
|                               | <b>D878</b> (3394) <b>E</b> | America (Dom Rep)    | KU853012; KU853013                                                                   | ZIKV infection                            |
|                               | <b>K881</b> (3397) <b>R</b> | Africa               | HQ234500                                                                             | Mosquitoes                                |
|                               | <b>M883</b> (3399) <b>V</b> | Asia (Chi/Sam)       | KU866423                                                                             | ZIKV infection                            |
|                               |                             | Asia (Cambodia)      | JN860885                                                                             | ZIKV infection                            |
| RdRp domain<br>(Priming Loop) | <b>A784</b> (3300) <b>S</b> | Africa               | All African sequences                                                                | Sentinel monkey, cell culture, mosquitoes |
|                               | <b>V787</b> (3303) <b>A</b> | Africa               | HQ234500                                                                             | Mosquitoes                                |

<sup>1</sup>: Mutations according to the PBD numbering in bold letter, and polyprotein numbering in brackets (uniprot entry Q32ZE10).



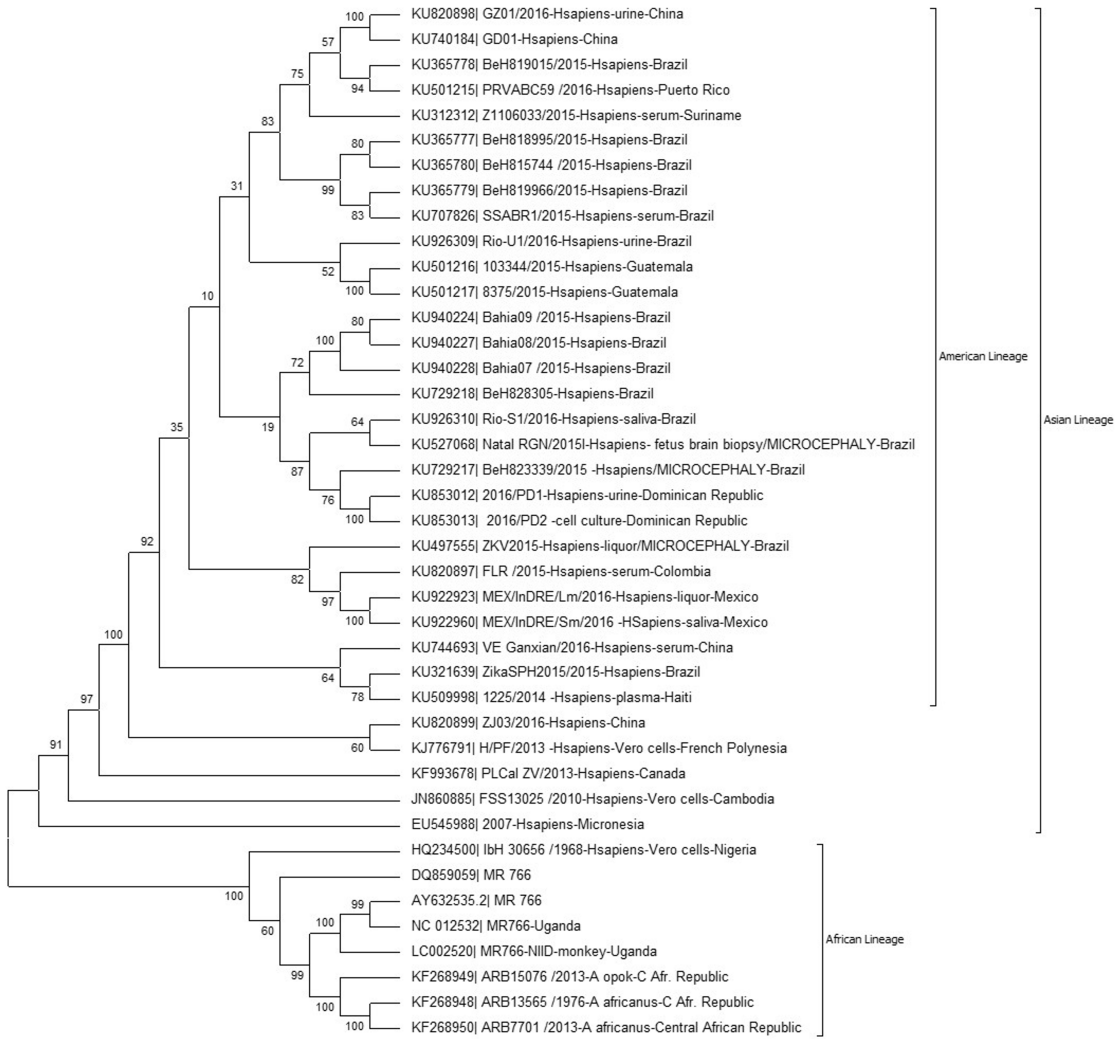

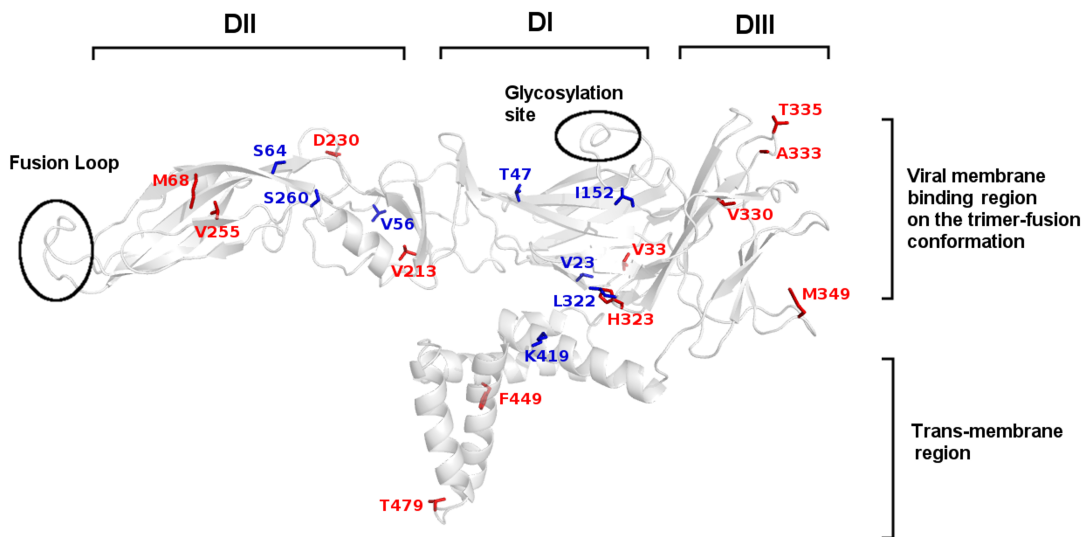

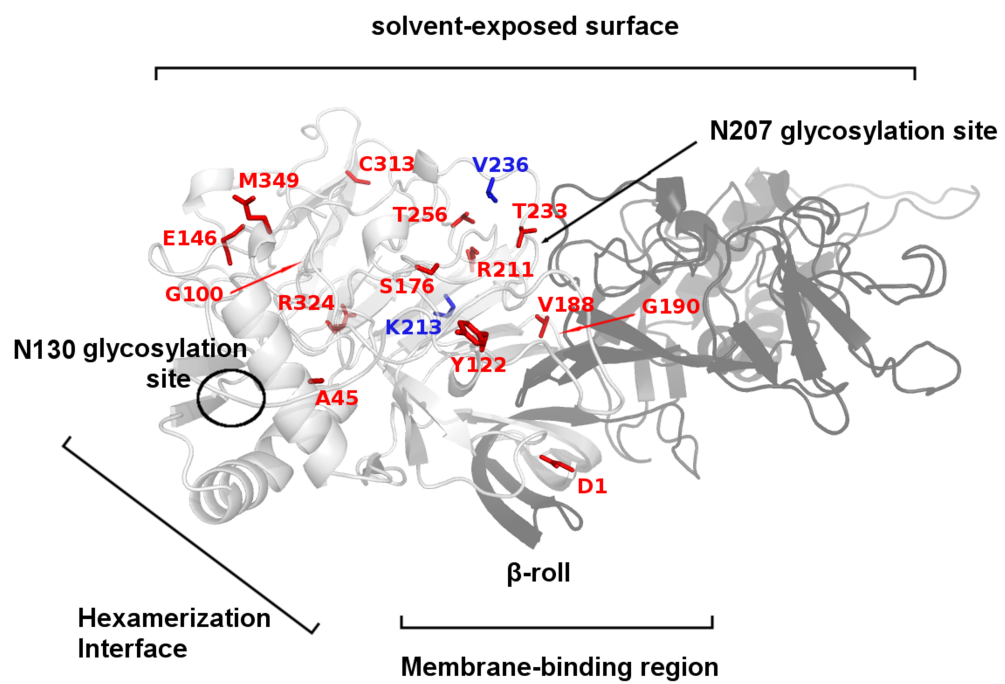

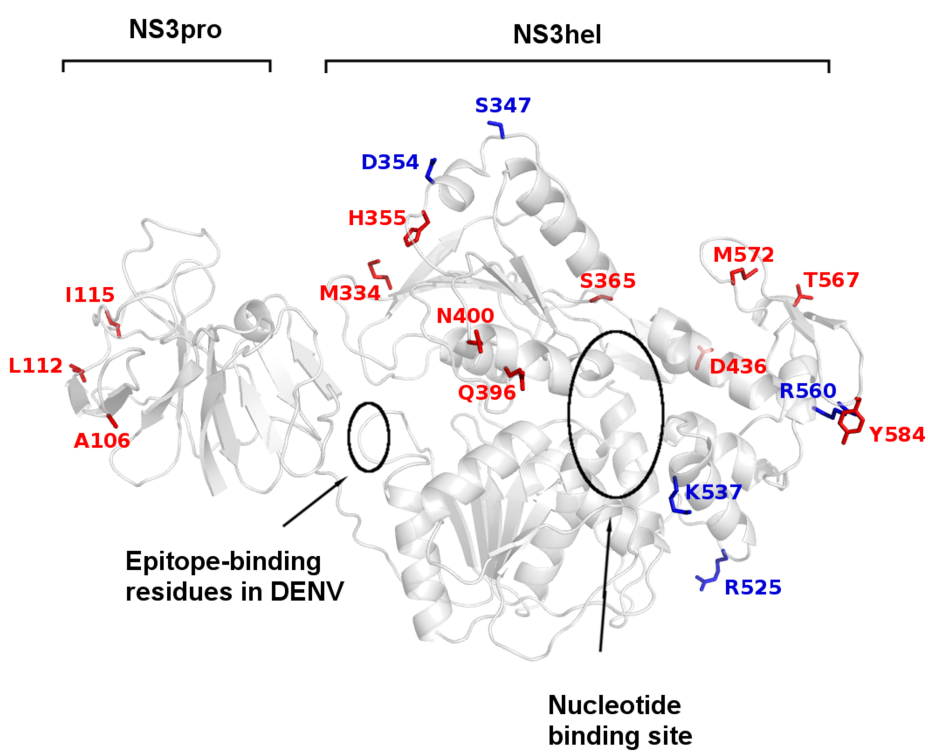

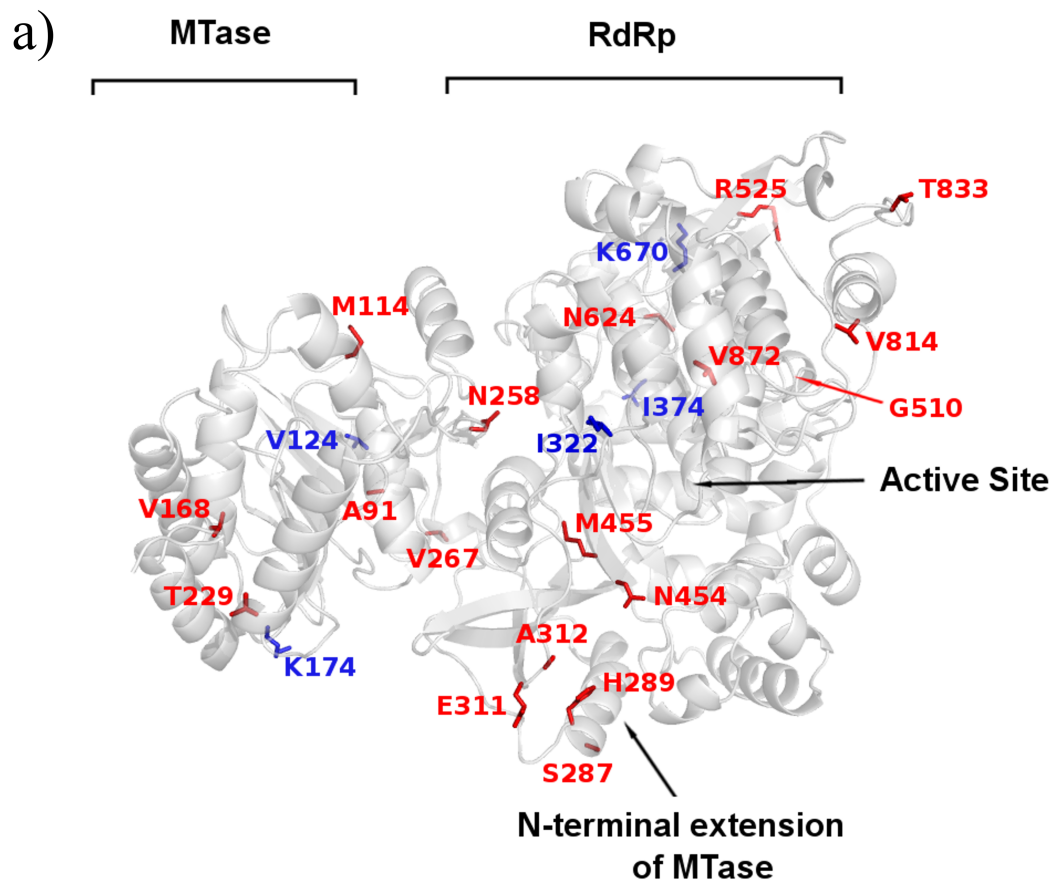

b)

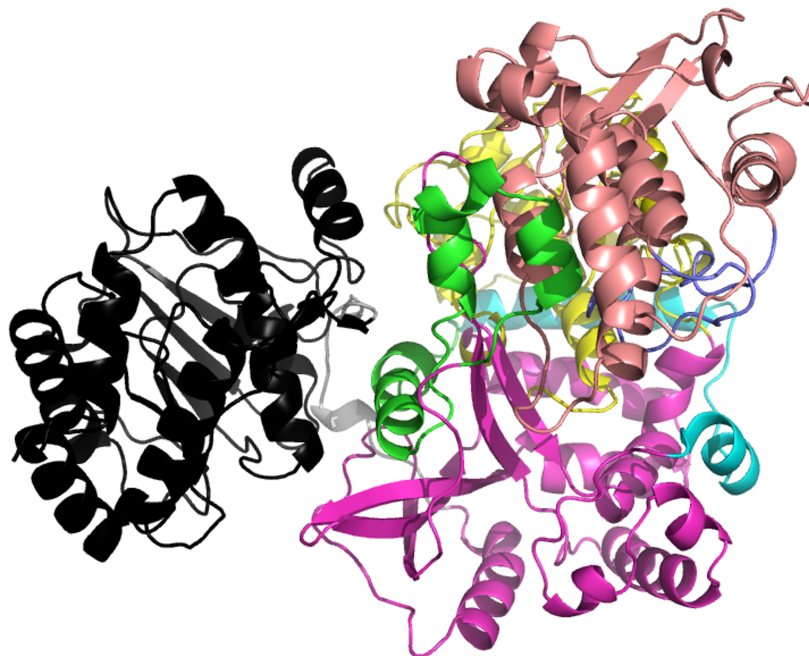

A)

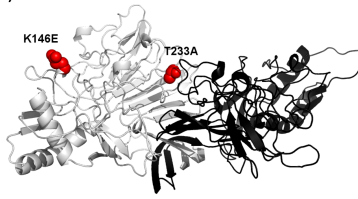

B)

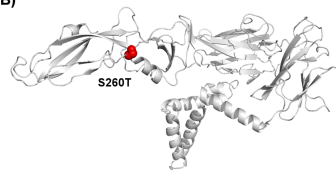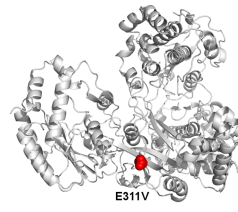

C)

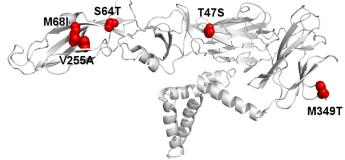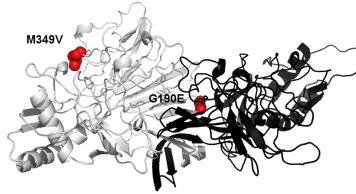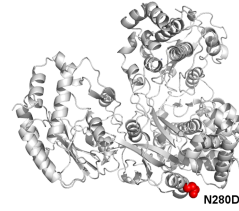

Supplement: c6mb00645k1.pdf [file c6mb00645k1.pdf]
